# Supplementary material for: Computerized Cognitive Behavioral Therapy to Treat Emotional Distress After Stroke: A Feasibility Randomized Controlled Trial
Source: PubMed Central journal article supplement (PMC5471343; doi:10.2196/mental.6022), 2017-05-31
Supplement: mental_v4i2e16_app1.pdf [file mental_v4i2e16_app1.pdf]

Table 1. Summary of the structure and content included in the two interventions.

| Module | cCBT: Beating the Blues                                                                                         |                                                                                                                    | cCRT: ForemenRehab                                                                                                                |
|--------|-----------------------------------------------------------------------------------------------------------------|--------------------------------------------------------------------------------------------------------------------|-----------------------------------------------------------------------------------------------------------------------------------|
| 1      | Problem definition and identifying pleasurable events<br>Identifying thinking errors and distraction techniques |                                                                                                                    | Introduction to attention and areas of the brain involved,<br>followed by attention training exercises                            |
| 2      | <i>Cognitive</i><br>Identifying negative<br>automatic thoughts                                                  | <i>Behavioral</i><br>Choice of<br>Scheduling pleasurable events                                                    | Introduction to memory and areas of the brain involved,<br>followed by memory training exercises                                  |
| 3      | Introduction to thinking<br>errors and distraction<br>techniques                                                | <i>or</i><br>Structured problem solving                                                                            |                                                                                                                                   |
| 4      | Evaluating negative<br>automatic thoughts                                                                       | Switch to learning remaining technique<br>Scheduling pleasurable events<br><i>or</i><br>Structured problem solving | Introduction to executive functioning and areas of the brain<br>involved, followed by executive functioning training<br>exercises |
| 5      |                                                                                                                 |                                                                                                                    | Choice of<br>Attention<br>Memory<br>Visual perception                                                                             |
| 6      | Identifying and evaluating<br>core beliefs                                                                      | Choice of<br>Graded exposure to anxiety-provoking<br>stimuli                                                       | <i>and/or</i><br>Executive functioning<br>to suit individual need                                                                 |
| 7      | Attributional style                                                                                             | Structured ways of breaking tasks down<br><br><i>or</i><br>Sleep management                                        |                                                                                                                                   |
| 8      | Action planning and conclusions                                                                                 |                                                                                                                    |                                                                                                                                   |
